# Supplementary material for: Chemistry of zipping reactions in mesoporous carbon consisting of minimally stacked graphene layers
Source: Royal Society of Chemistry journal article supplement (doi:10.1039/d3sc02163g), 2023-01-01
Supplement: d3sc02163g1.pdf [file d3sc02163g1.pdf]

Supporting Information

# Chemistry of zipping reactions in mesoporous carbon consisting of minimally stacked graphene layers

Tian Xia,<sup>a</sup> Takeharu Yoshii,<sup>\*a</sup> Keita Nomura,<sup>a</sup> Keigo Wakabayashi,<sup>a</sup> Zheng-Ze Pan,<sup>b</sup> Takafumi Ishii,<sup>c</sup> Hideki Tanaka,<sup>d</sup> Takashi Mashio,<sup>e</sup> Jin Miyawaki,<sup>e,f</sup> Toshiya Otomo,<sup>g,h,i,j</sup> Kazutaka Ikeda,<sup>g,h,i</sup> Yohei Sato,<sup>a</sup> Masami Terauchi,<sup>a</sup> Takashi Kyotani,<sup>a</sup> Hiroto Nishihara <sup>\*a,b</sup>

<sup>a</sup> Institute of Multidisciplinary Research for Advanced Materials, Tohoku University, 2-1-1 Katahira, Aoba-ku, Sendai, Miyagi, 980-8577, Japan

<sup>b</sup> Advanced Institute for Materials Research, Tohoku University, 2-1-1 Katahira, Aobaku, Sendai, Miyagi, 980-8577, Japan

<sup>c</sup> International Research and Education Center for Element Science Faculty of Science and Technology, Gunma University, 1-5-1 Tenjincho, Kiryu, Gunma, 376-8515, Japan

<sup>d</sup> Research Initiative for Supra-Materials (RISM), Shinshu University, 4-17-1 Wakasato, Nagano, 380-8553, Japan

<sup>e</sup> Interdisciplinary Graduate School of Engineering Sciences, Kyushu University, 6-1 Kasuga-koen, Kasuga, Fukuoka, 816-8580, Japan

<sup>f</sup> Institute for Materials Chemistry and Engineering, Kyushu University, 6-1 Kasuga-koen, Kasuga, Fukuoka, 816-8580, Japan

<sup>g</sup> Institute of Materials Structure Science, High Energy Accelerator Research Organization (KEK), 203-1 Shirakata, Tokai, Ibaraki, 319-1106, Japan

<sup>h</sup> J-PARC Center, High Energy Accelerator Research Organization (KEK), 2-4 Shirakata-Shirane, Tokai, Ibaraki, 319-1106, Japan

<sup>i</sup> School of High Energy Accelerator Science, The Graduate University for Advanced Studies, 203-1 Shirakata, Tokai, Ibaraki, 319-1106, Japan

<sup>j</sup> Graduate School of Science and Engineering, Ibaraki University, 162-1 Shirakata, Tokai, Ibaraki, 319-1106, Japan

## Corresponding Author

\*Email: takeharu.yoshii.b3@tohoku.ac.jp, hirotomo.nishihara.b1@tohoku.ac.jp

## N<sub>2</sub> adsorption-desorption isotherms

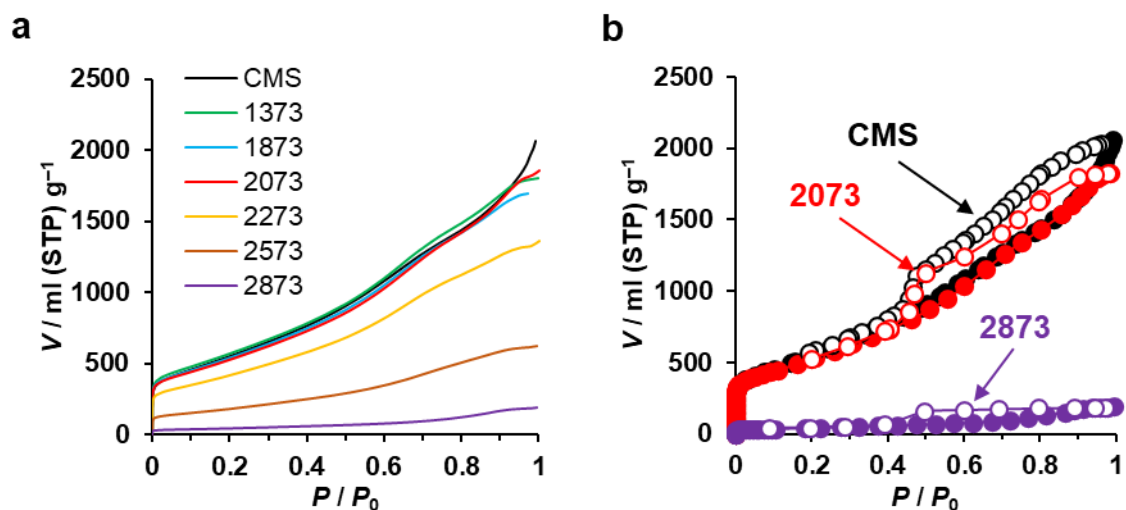

**Figure S1** (a) N<sub>2</sub> adsorption isotherms of CMS and its heat-treated samples. (b) N<sub>2</sub> adsorption-desorption isotherms of CMS and samples heat-treated at 2073 and 2873 K.

## PXRD and Raman results

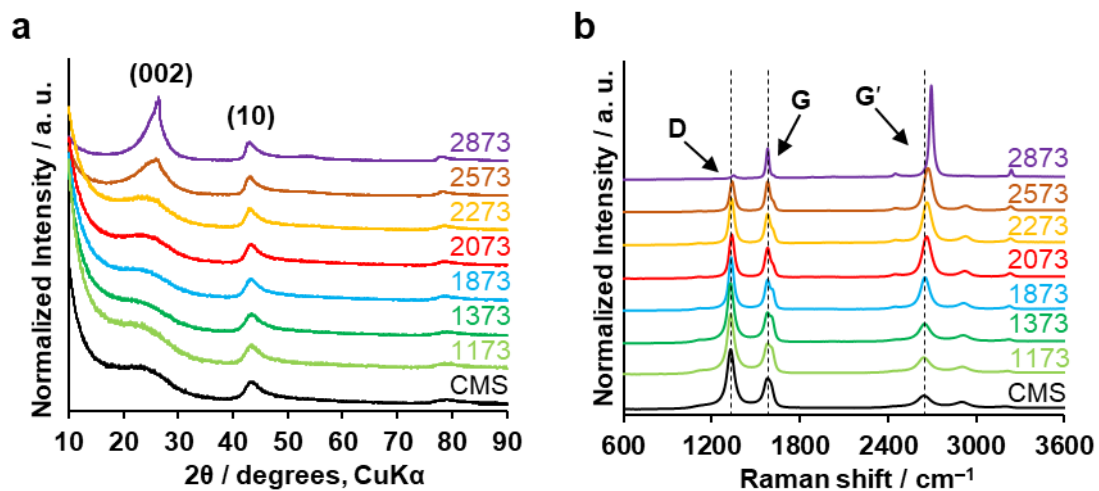

**Figure S2** (a) PXRD patterns and (b) Raman spectra of CMS and its heat-treated samples. The peak positions of D-, G-, and G'-bands of CMS are shown with dashed vertical lines.

## TPD results

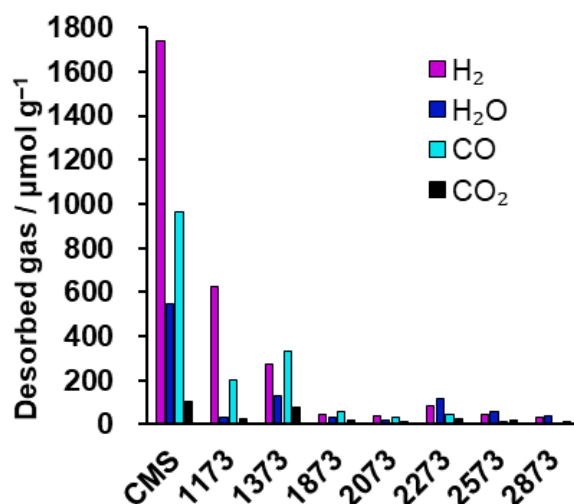

**Figure S3** Desorbed amounts of H<sub>2</sub>, H<sub>2</sub>O, CO and CO<sub>2</sub> from the TPD analysis of CMS and its heat-treated samples.

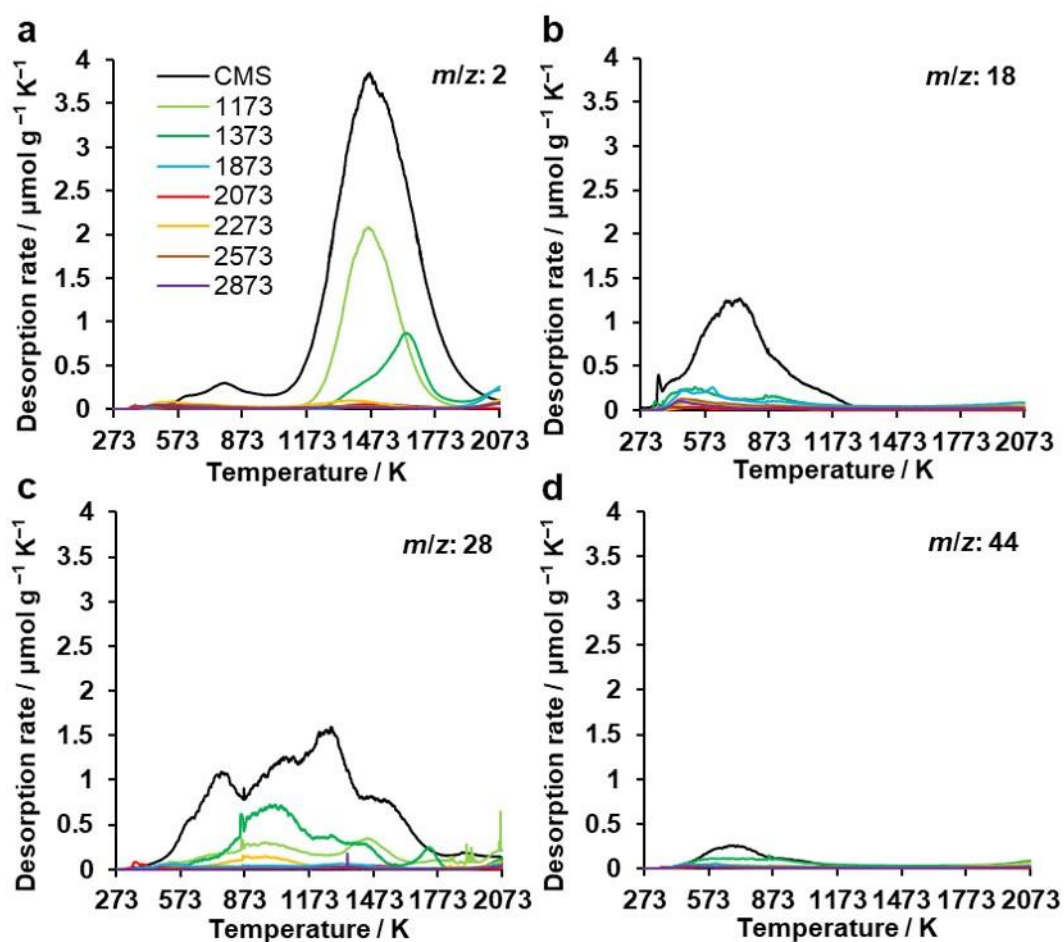

**Figure S4** The gas-evolution profiles of CMS and its heat-treated samples for a) H<sub>2</sub> ( $m/z = 2$ ), b) H<sub>2</sub>O ( $m/z = 18$ ), c) CO ( $m/z = 28$ ), and CO<sub>2</sub> ( $m/z = 44$ ).

## H<sub>2</sub>O-vapor adsorption

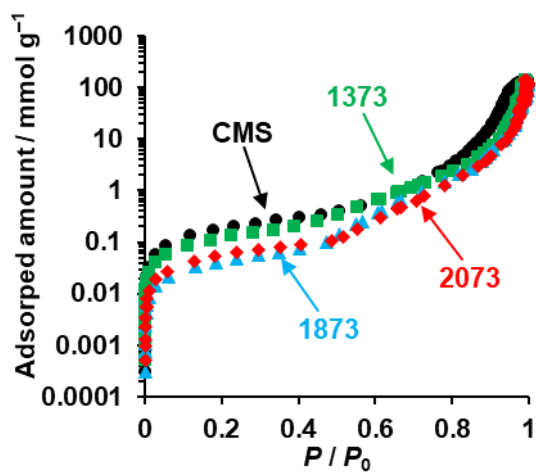

**Figure S5** H<sub>2</sub>O-vapor adsorption isotherms on CMS and its heat-treated samples at 298 K.

## Solid-state $^{13}\text{C}$ NMR

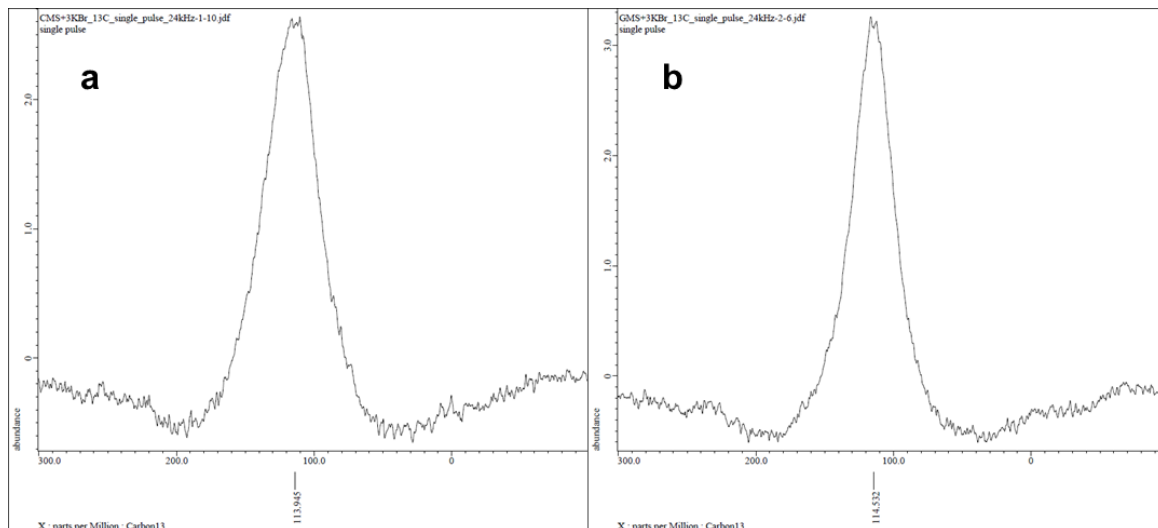

**Figure S6** Solid-state  $^{13}\text{C}$  NMR spectra of a) CMS and b) CMS treated at 2073 K.

# SXES

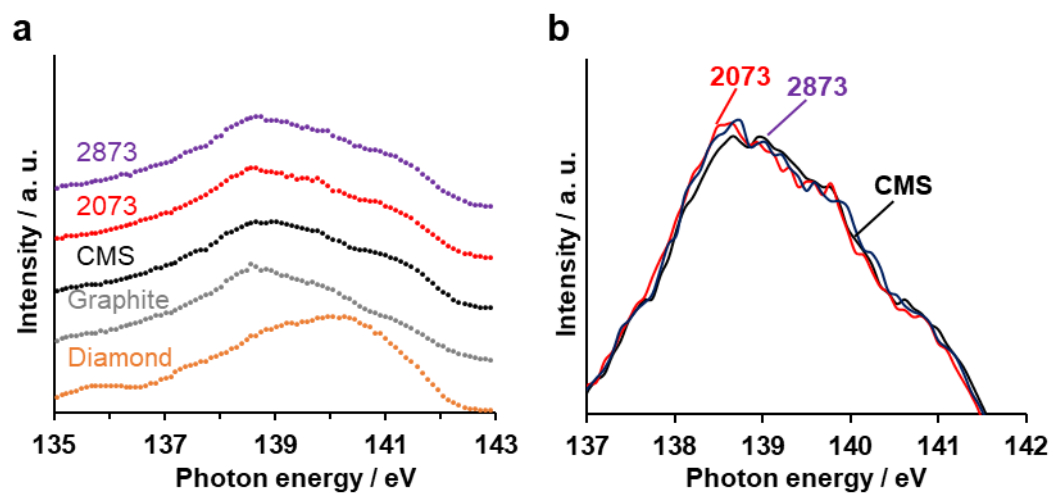

**Figure S7** (a) Soft X-ray emission spectra (SXES) of CMS, its heat-treated samples, graphite, and diamond. (b) Enlarged patterns for CMS and its heat-treated samples.

## CV results

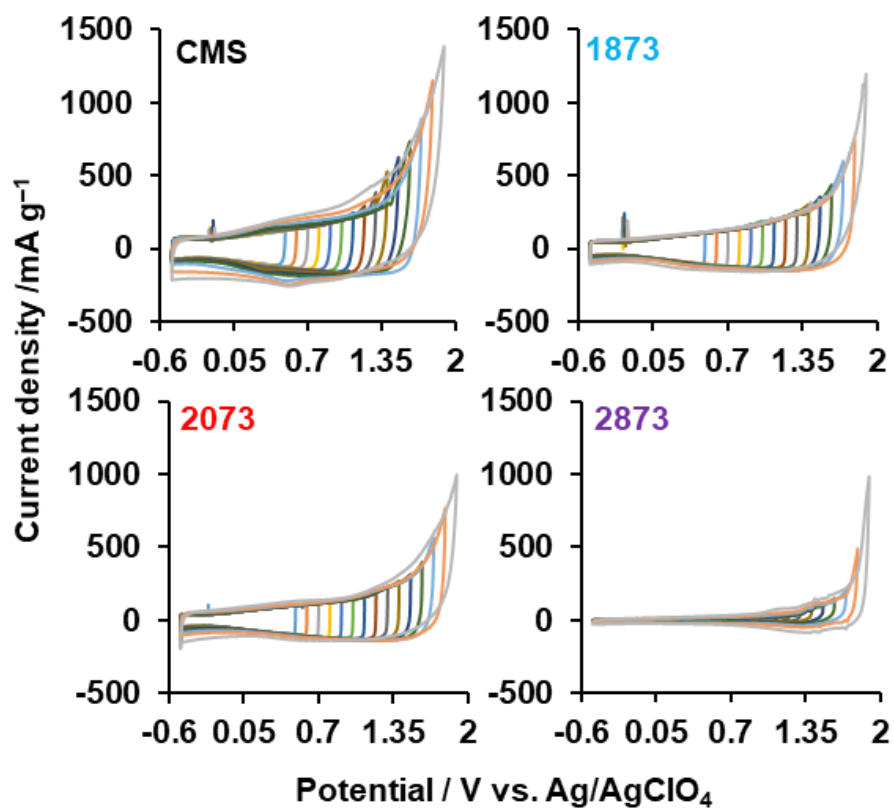

**Figure S8** CV curves of CMS and its heat-treated samples measured with a three-electrode cell in 1M Et<sub>4</sub>NBF<sub>4</sub>/PC at 298 K. The first cycle at each potential range is shown. The scan rate is 1 mV s<sup>-1</sup>. The CV curves shown here were used for the calculation of  $Q_{ir}$ .



## Mercury intrusion

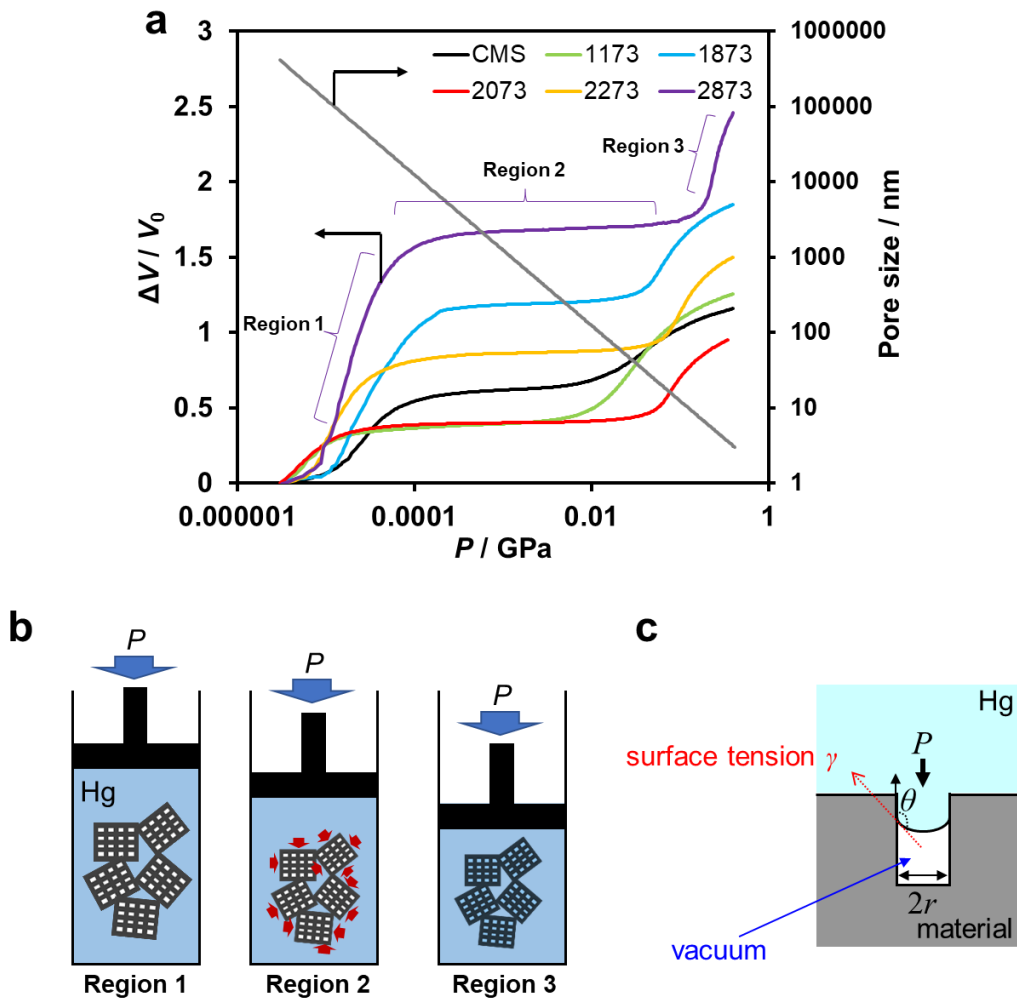

**Figure S9** Mercury intrusion results of CMS and its heat-treated samples. (a) Applied pressure against  $\Delta V/V_0$ .  $\Delta V$  and  $V_0$  are the volume change of mercury+sample and initial sample volume, respectively. The relationship between the mercury pressure and the pore size which is filled with Hg is plotted as a straight gray line. (b) The illustration of explanation of principle of mercury intrusion test. (c) The illustration of contact between mercury and the porous material, in which the following equation holds

$$r = -\frac{2\gamma \cos \theta}{P}$$

where  $r$ ,  $P_{\text{Hg}}$ ,  $\gamma$ , and  $\theta$  are the radius of the capillary, the pressure of Hg, the surface tension of Hg, and the contact angle of Hg.

**Table S1** Comparison of  $L_{\text{PXRd}}$  and  $L_{\text{TPD}}$  of CMS and its heat-treated samples.

|                        | <b>CMS</b> | <b>1173</b> | <b>1373</b> | <b>1873</b> | <b>2073</b> | <b>2873</b> |
|------------------------|------------|-------------|-------------|-------------|-------------|-------------|
| $L_{\text{PXRd}}$ [nm] | 6.2        | 6.4         | 7.1         | 7.5         | 8.2         | 12.5        |
| $L_{\text{TPD}}$ [nm]  | 6.9        | 26.2        | 33.4        | 165         | 270         | 260         |
